# Supplementary material
Source: PubMed Central journal article supplement (PMC9903704)

**Cell Genomics, Volume 2**

**Supplemental information**

**Machine learning optimized polygenic scores  
for blood cell traits identify sex-specific trajectories  
and genetic correlations with disease**

**Yu Xu, Dragana Vuckovic, Scott C. Ritchie, Parsa Akbari, Tao Jiang, Jason Grealey, Adam S. Butterworth, Willem H. Ouwehand, David J. Roberts, Emanuele Di Angelantonio, John Danesh, Nicole Soranzo, and Michael Inouye**

## Supplementary Tables and Figures

**Table S1. Summary of measurement methods for the 26 blood cell traits, related to STAR Methods**

| Cell Type         | Standard Abbreviation | Long Name                                 | Unit   | Description                                                                                                              | Coulter LH 700 Series (UK Biobank) |                                                                     | Sysmex XN-1000 (INTERVAL) |                                                                   |
|-------------------|-----------------------|-------------------------------------------|--------|--------------------------------------------------------------------------------------------------------------------------|------------------------------------|---------------------------------------------------------------------|---------------------------|-------------------------------------------------------------------|
|                   |                       |                                           |        |                                                                                                                          | Measured / Derived                 | Determination                                                       | Measured / Derived        | Determination                                                     |
| Platelet          | PLT#                  | Platelet count                            | per nL | Count of platelets per unit volume of blood                                                                              | Measured                           | Impedance                                                           | Measured                  | Flow cytometry gate (impedance for missing data points)           |
|                   | MPV                   | Mean platelet volume                      | fL     | Mean volume of platelets                                                                                                 | Derived                            | $(PCT/PLT\#) \times 10000$                                          | Derived                   | $(PCT/PLT\#) \times 10000$                                        |
|                   | PDW                   | Platelet distribution width               | fL     | The spread of the platelet volume distribution. Note that Sysmex and Coulter use different statistics to measure spread. | Measured                           | Impedance: Coefficient of variation of platelet volume distribution | Measured                  | Impedance: width at 20% peak height of platelet volume histogram. |
|                   | PCT                   | Plateletcrit                              | %      | Volume fraction of blood occupied by platelets                                                                           | Measured                           | Impedance                                                           | Measured                  | Impedance                                                         |
|                   | RBC#                  | Red blood cell count                      | per pL | Count of red blood cells per unit volume of blood                                                                        | Measured                           | Impedance                                                           | Measured                  | Impedance                                                         |
| Mature red cell   | MCV                   | Mean corpuscular volume                   | fL     | Mean volume of red blood cells                                                                                           | Derived                            | $(HCT/RBC\#) \times 10$                                             | Derived                   | $(HCT/RBC\#) \times 10$                                           |
|                   | HCT                   | Hematocrit                                | %      | Volume fraction of blood occupied by red cells                                                                           | Measured                           | Impedance                                                           | Measured                  | Impedance                                                         |
|                   | MCH                   | Mean corpuscular hemoglobin               | pg     | Average mass of hemoglobin per red cell                                                                                  | Derived                            | $(HGB/RBC\#) \times 10$                                             | Derived                   | $(HGB/RBC\#) \times 10$                                           |
|                   | MCHC                  | Mean corpuscular hemoglobin concentration | g/dL   | Concentration of hemoglobin with respect to unit of volume occupied by red cells                                         | Derived                            | $(HGB/HCT) \times 100$                                              | Derived                   | $(HGB/HCT) \times 100$                                            |
|                   | HGB                   | Hemoglobin concentration                  | g/dL   | Concentration of hemoglobin with respect to unit of volume of blood                                                      | Measured                           | Light absorbance                                                    | Measured                  | Light absorbance                                                  |
| Immature red cell | RET#                  | Reticulocyte count                        | pL     | Count of reticulocytes per unit volume of blood                                                                          | Derived                            | $(RET\% \times RBC\#) / 100$                                        | Derived                   | $(RET\% \times RBC\#) / 100$                                      |
|                   | RET%                  | Reticulocyte fraction of red cells        | %      | Percentage of red blood cells that are reticulocytes                                                                     | Measured                           | Flow cytometry/impedance                                            | Measured                  | Flow cytometry gates                                              |
|                   | IRF                   | Immature fraction of reticulocytes        | -      | Fraction of reticulocytes with high RNA content, as measured by light scatter                                            | Derived                            | HLSR#/RET#                                                          | Measured                  | Flow cytometry gates                                              |

| Cell Type           | Standard Abbreviation | Long Name                                               | Unit   | Description                                                                 | Coulter LH 700 Series (UK Biobank) |                                | Sysmex XN-1000 (INTERVAL) |                      |
|---------------------|-----------------------|---------------------------------------------------------|--------|-----------------------------------------------------------------------------|------------------------------------|--------------------------------|---------------------------|----------------------|
|                     |                       |                                                         |        |                                                                             | Measured / Derived                 | Determination                  | Measured / Derived        | Determination        |
| Immature red cell   | HLSR#                 | High light scatter reticulocyte count                   | per pL | Count of high RNA content (immature) reticulocytes per unit volume of blood | Derived                            | (HLSR%×RBC#)/100%              | Derived                   | IRF×RET#             |
|                     | HLSR%                 | High light scatter reticulocyte percentage of red cells | %      | Immature reticulocyte count as a percentage of red blood cell count         | Measured                           | Flow cytometry/impedance gates | Derived                   | (HLSR#/RBC#)×100%    |
| Myeloid white cell  | MONO#                 | Monocyte count                                          | per nL | Count of monocytes per unit volume of blood                                 | Derived                            | (MONO%×WBC#)/100%              | Derived                   | (MONO%×WBC#)/100%    |
|                     | NEUT#                 | Neutrophil count                                        | per nL | Count of neutrophils per unit volume of blood                               | Derived                            | (NEUT%×WBC#)/100%              | Derived                   | (NEUT%×WBC#)/100%    |
|                     | EO#                   | Eosinophil count                                        | per nL | Count of eosinophils per unit volume of blood                               | Derived                            | (EO%×WBC#)/100%                | Derived                   | (EO%×WBC#)/100%      |
|                     | BASO#                 | Basophil count                                          | per nL | Count of basophils per unit volume of blood                                 | Derived                            | (BASO%×WBC#)/100%              | Derived                   | (BASO%×WBC#)/100%    |
| Lymphoid white cell | LYMPH#                | Lymphocyte count                                        | per nL | Aggregate count of lymphoid cells per unit volume of blood                  | Derived                            | (LYMPH%×WBC#)/100%             | Derived                   | (LYMPH%×WBC#)/100%   |
| Compound white cell | WBC#                  | White blood cell count                                  | per nL | Aggregate count of white cells per unit volume of blood                     | Measured                           | Impedance                      | Measured                  | Flow cytometry gates |
|                     | MONO%                 | Monocyte percentage of white cells                      | %      | Percentage of white cells that are monocytes                                | Measured                           | Flow cytometry gates           | Measured                  | Flow cytometry gates |
|                     | NEUT%                 | Neutrophil percentage of white cells                    | %      | Percentage of white cells that are neutrophils                              | Measured                           | Flow cytometry gates           | Measured                  | Flow cytometry gates |
|                     | EO%                   | Eosinophil percentage of white cells                    | %      | Percentage of white cells that are eosinophils                              | Measured                           | Flow cytometry gates           | Measured                  | Flow cytometry gates |
|                     | BASO%                 | Basophil percentage of white cells                      | %      | Percentage of white cells that are basophils                                | Measured                           | Flow cytometry gates           | Measured                  | Flow cytometry gates |
|                     | LYMPH%                | Lymphocyte percentage of white cells                    | %      | Percentage of white cells that are lymphocytes                              | Measured                           | Flow cytometry gates           | Measured                  | Flow cytometry gates |
|                     |                       |                                                         |        |                                                                             |                                    |                                |                           |                      |

**Table S2. The number of samples and conditional analysis variants used in UK biobank and INTERVAL for each blood cell trait, related to STAR Methods.** This table presents the number of valid samples after quality control and the number of variants selected in conditional analysis for each trait.

| Trait  | Number of Valid Samples |          | Number of Variants |
|--------|-------------------------|----------|--------------------|
|        | UK Biobank              | INTERVAL |                    |
| PLT#   | 391232                  | 38939    | 762                |
| MPV    | 391598                  | 37224    | 681                |
| PDW    | 391450                  | 37262    | 579                |
| PCT    | 390803                  | 37306    | 726                |
| RBC#   | 408069                  | 40262    | 707                |
| MCV    | 407157                  | 40080    | 739                |
| HCT    | 408112                  | 40340    | 513                |
| MCH    | 406517                  | 40108    | 682                |
| MCHC   | 407850                  | 40265    | 252                |
| HGB    | 407739                  | 40329    | 532                |
| RET#   | 396720                  | 40253    | 590                |
| RET%   | 396811                  | 40286    | 572                |
| IRF    | 396408                  | 40227    | 390                |
| HLSR#  | 400334                  | 40244    | 605                |
| HLSR%  | 400438                  | 40225    | 594                |
| MONO#  | 403994                  | 39177    | 674                |
| NEUT#  | 406788                  | 39138    | 512                |
| EO#    | 406470                  | 40276    | 623                |
| BASO#  | 404718                  | 39986    | 198                |
| LYMPH# | 407277                  | 39191    | 639                |
| WBC#   | 408032                  | 40466    | 659                |
| MONO%  | 403136                  | 39189    | 583                |
| NEUT%  | 407114                  | 39190    | 452                |
| EO%    | 406417                  | 40326    | 589                |
| BASO%  | 404532                  | 40133    | 160                |
| LYMPH% | 407319                  | 39178    | 489                |

**Figure S1. Comparison of CA variant effect sizes between GWAS and EN/BR method, related to Figure 2.** EN and BR generated almost the same effect sizes for conditional analysis variants of all the traits, thus for simplicity, this figure only compares the variant effect sizes between EN and the univariate analysis in GWAS. The mean of the 5 effect sizes in the 5 trained EN models for each variant is used as the variant effect size of EN in this figure. The variants whose MAF is smaller than 1% are marked with triangles and others are marked with circles. Those variants that were detected with interactions are marked in red, and variants that were correlated with others with  $r^2 > 0.1$  are marked in yellow. If variants fall in both of the scenarios, they are marked in green. Any other variants are marked in blue.

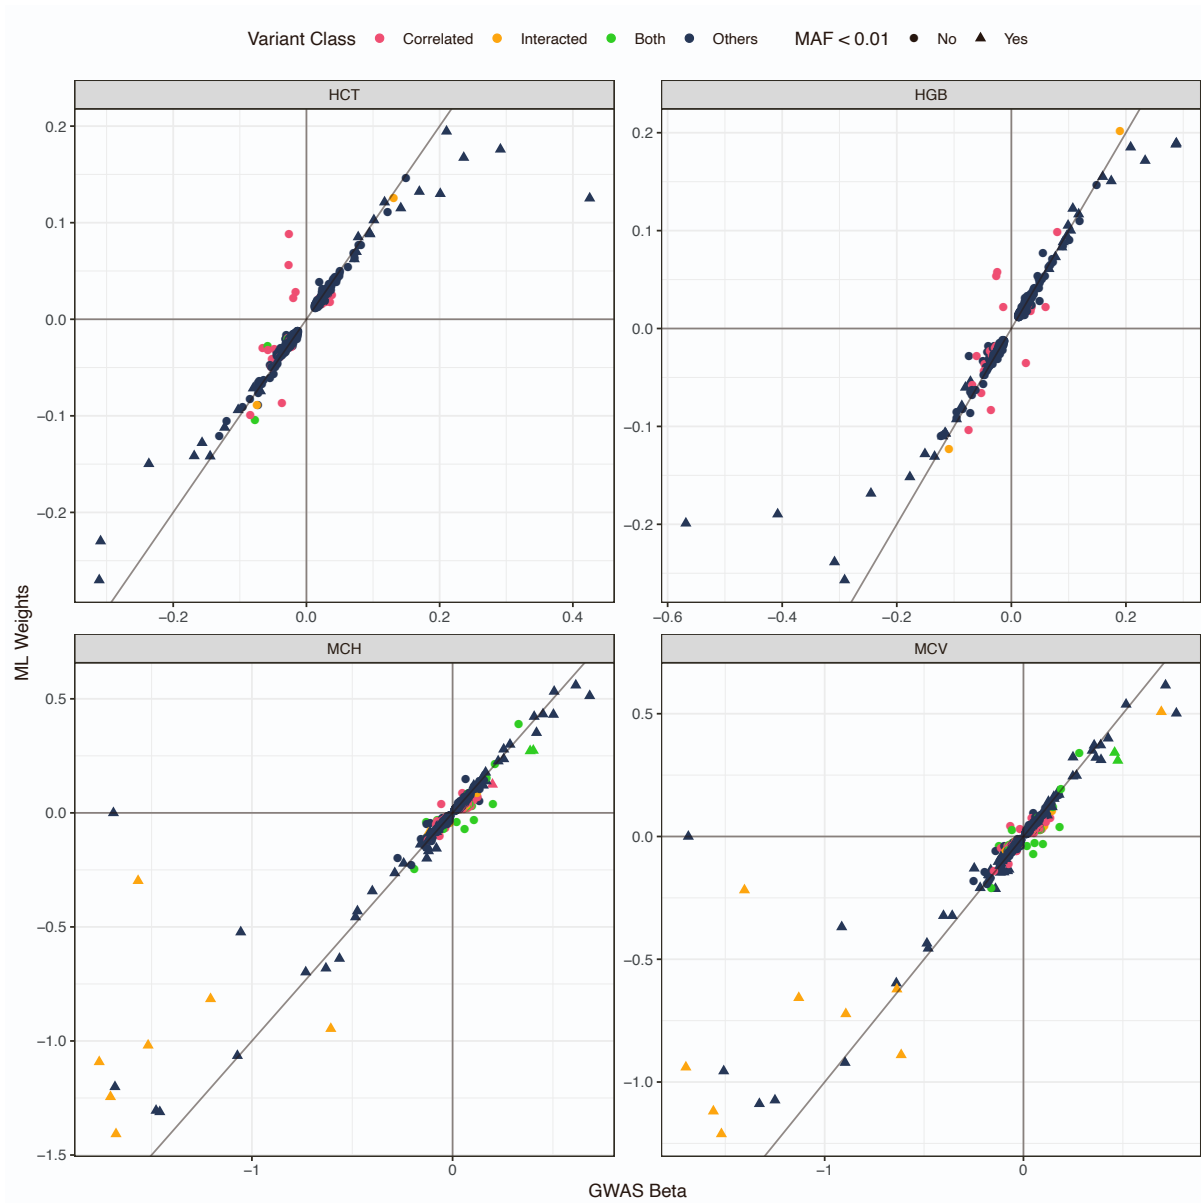

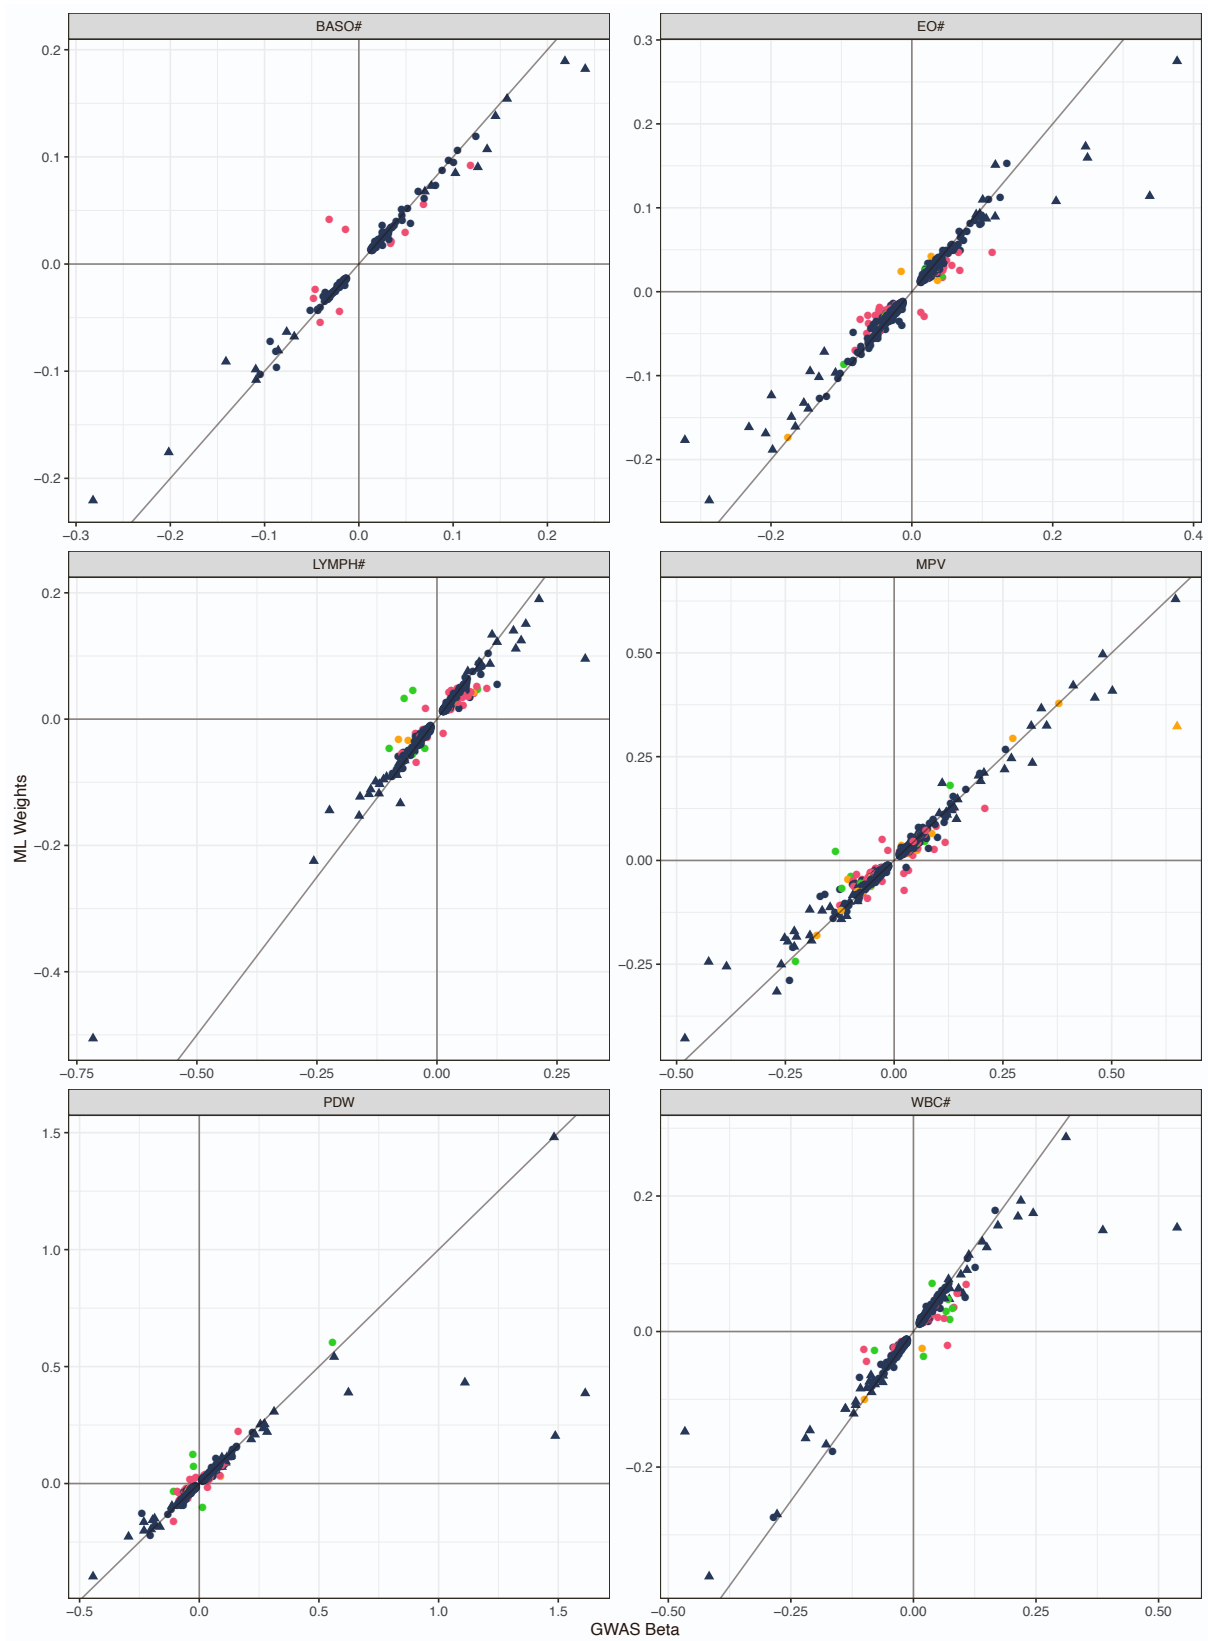

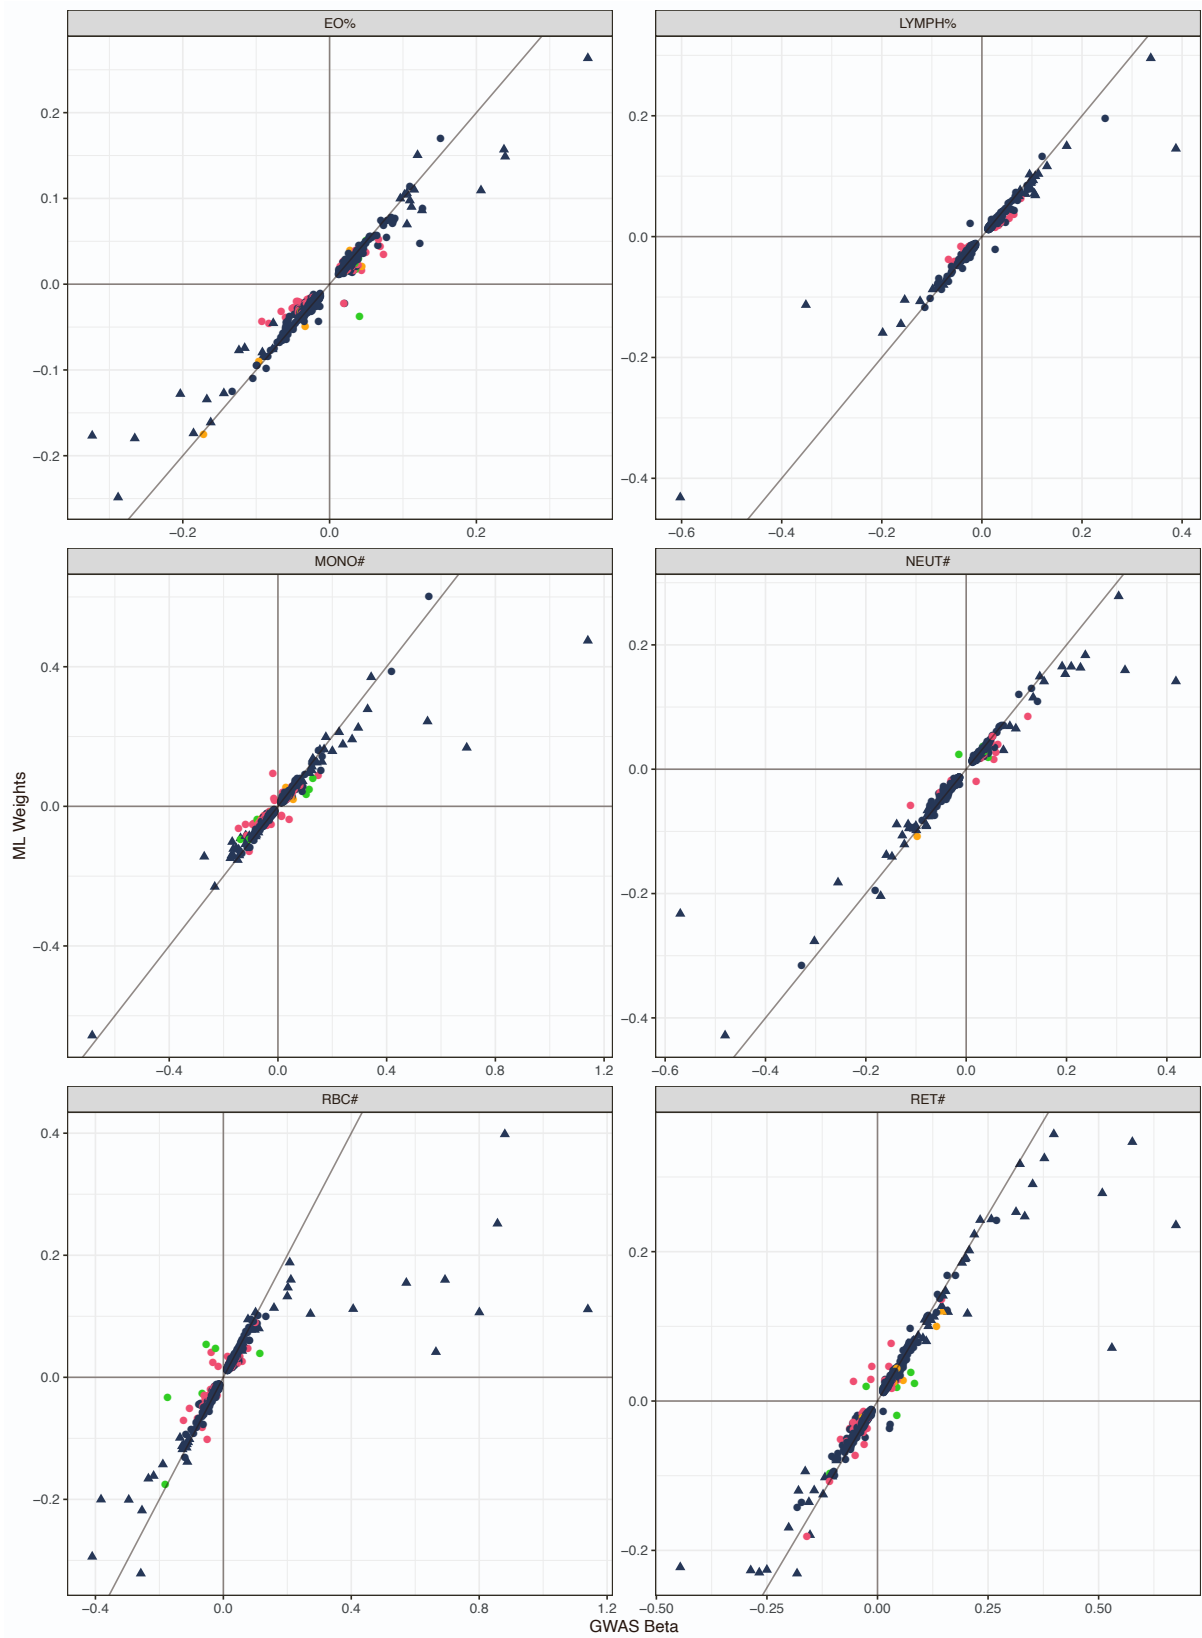

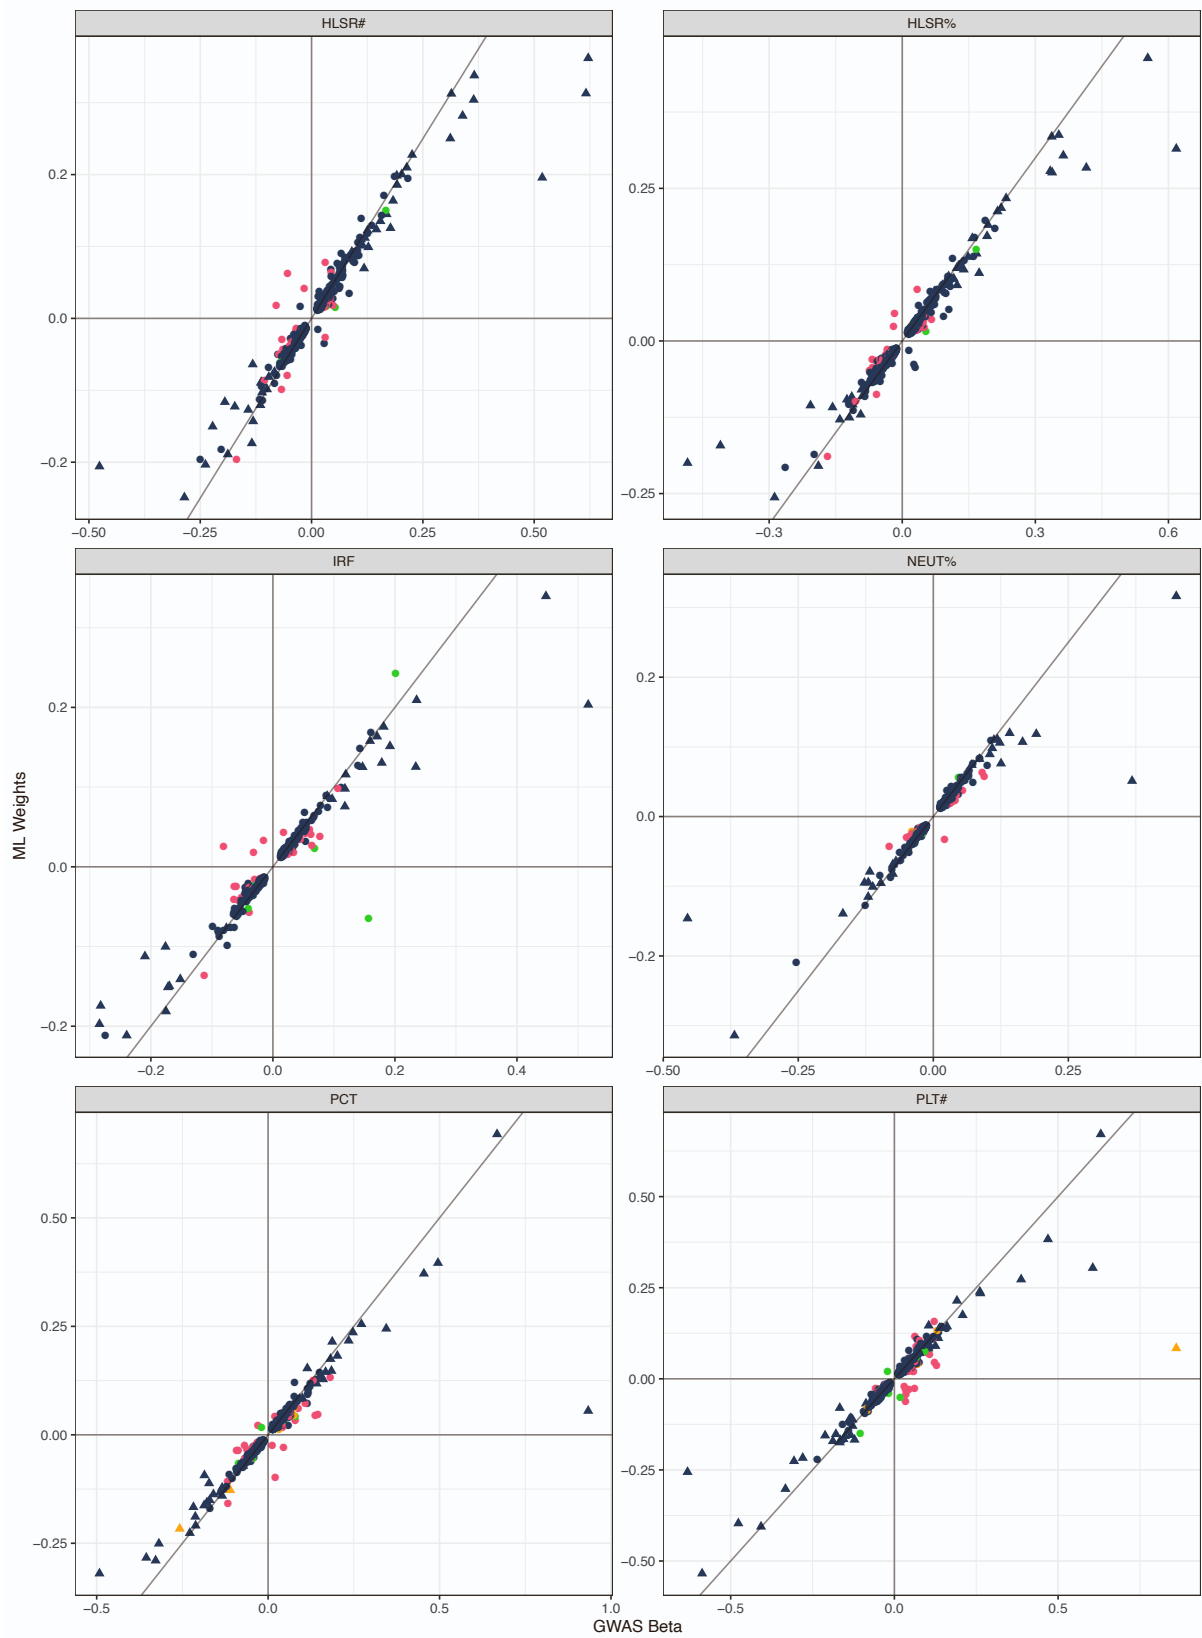



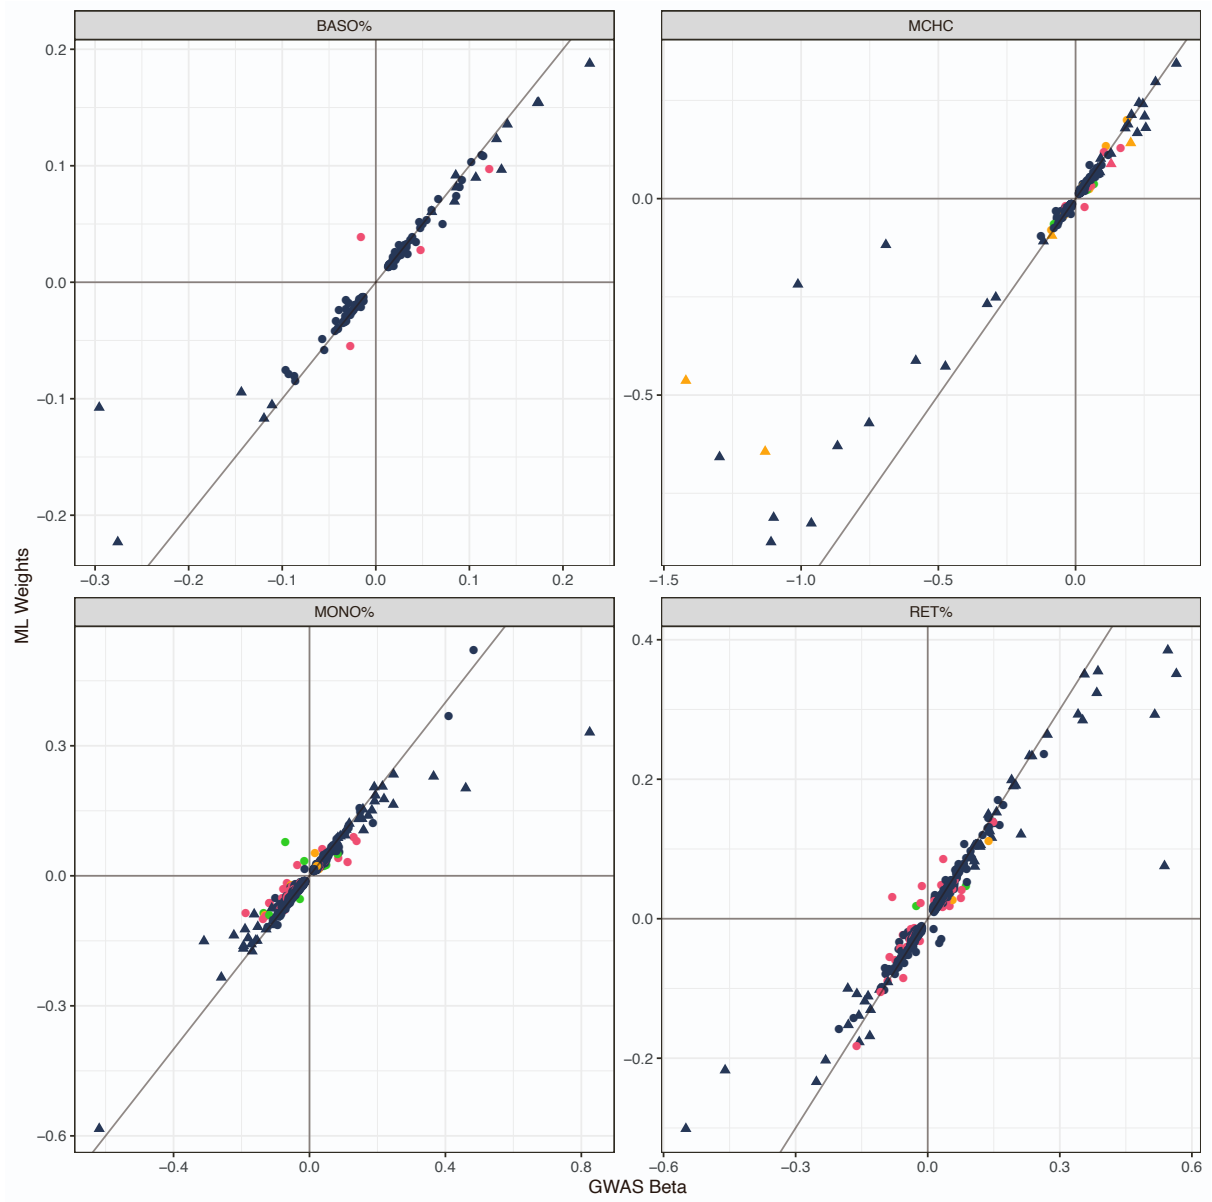

**Figure S2. Performance of P+T, EN and LDpred2 methods on different variant sets in UKB, related to Figure 3.**

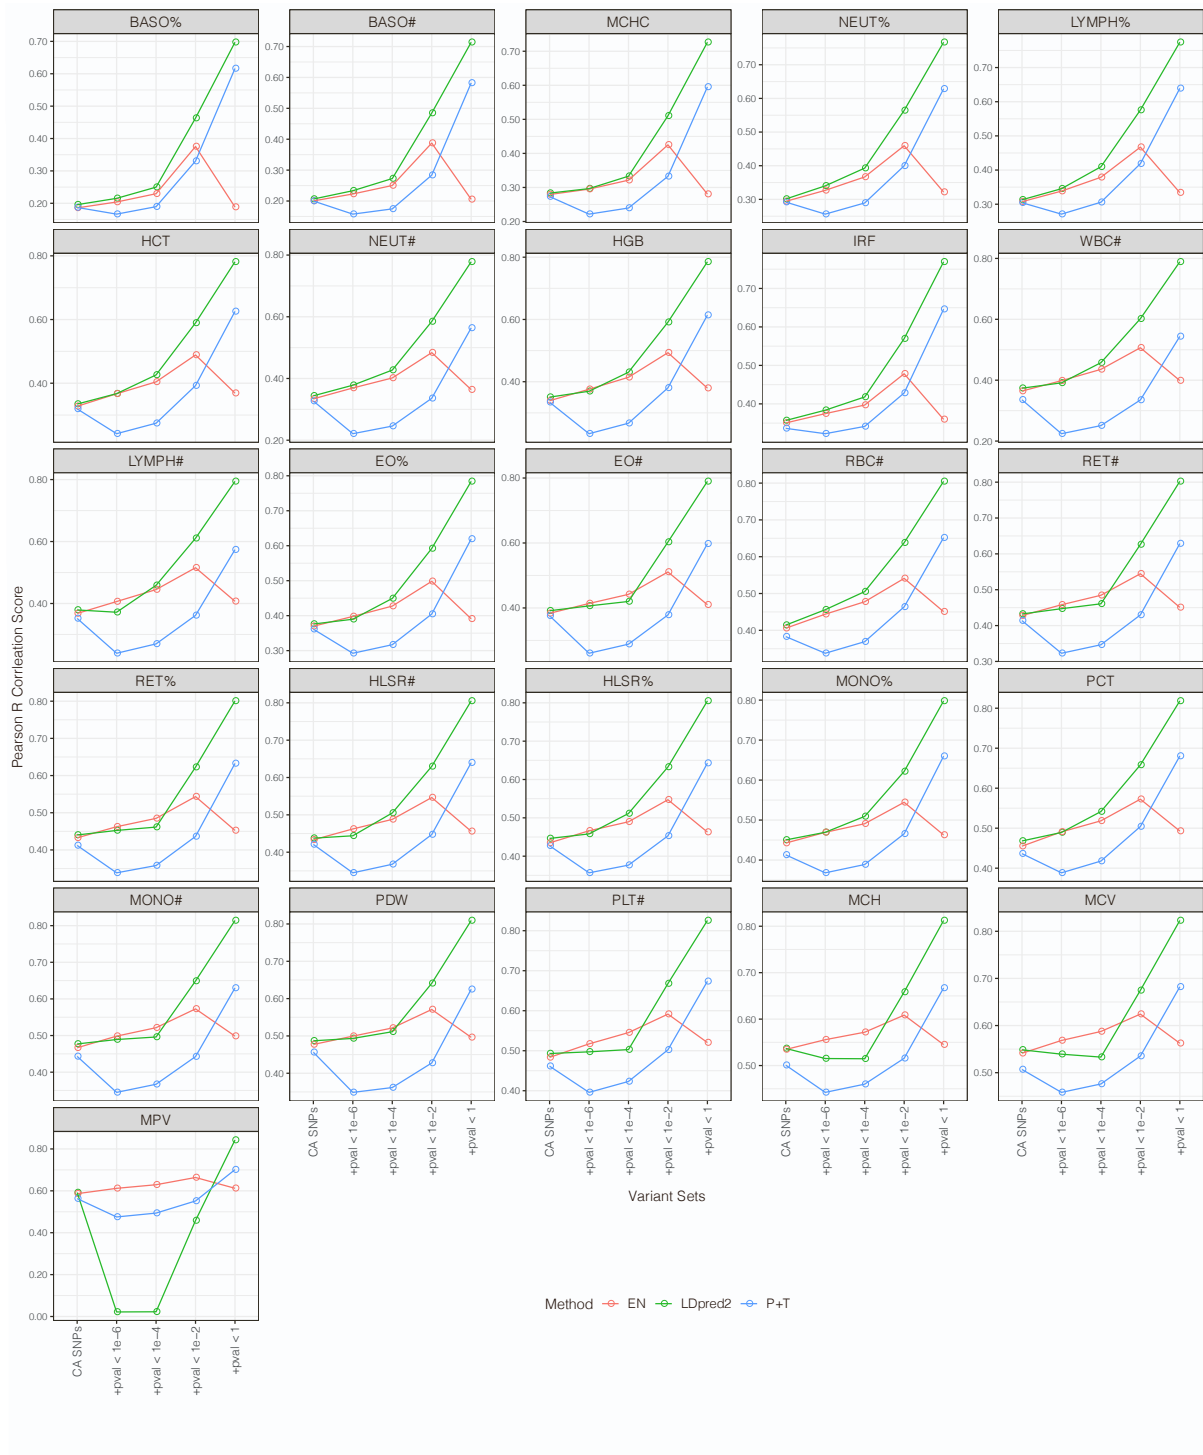

**Figure S3. Trait levels by quintiles of EN-trained trait PGSs in men and women for the other 23 blood cell traits on INTERVAL, related to Figure 4. The traits are ordered by their PGS  $r$  scores (trained using EN on the largest variant set) in INTERVAL.**

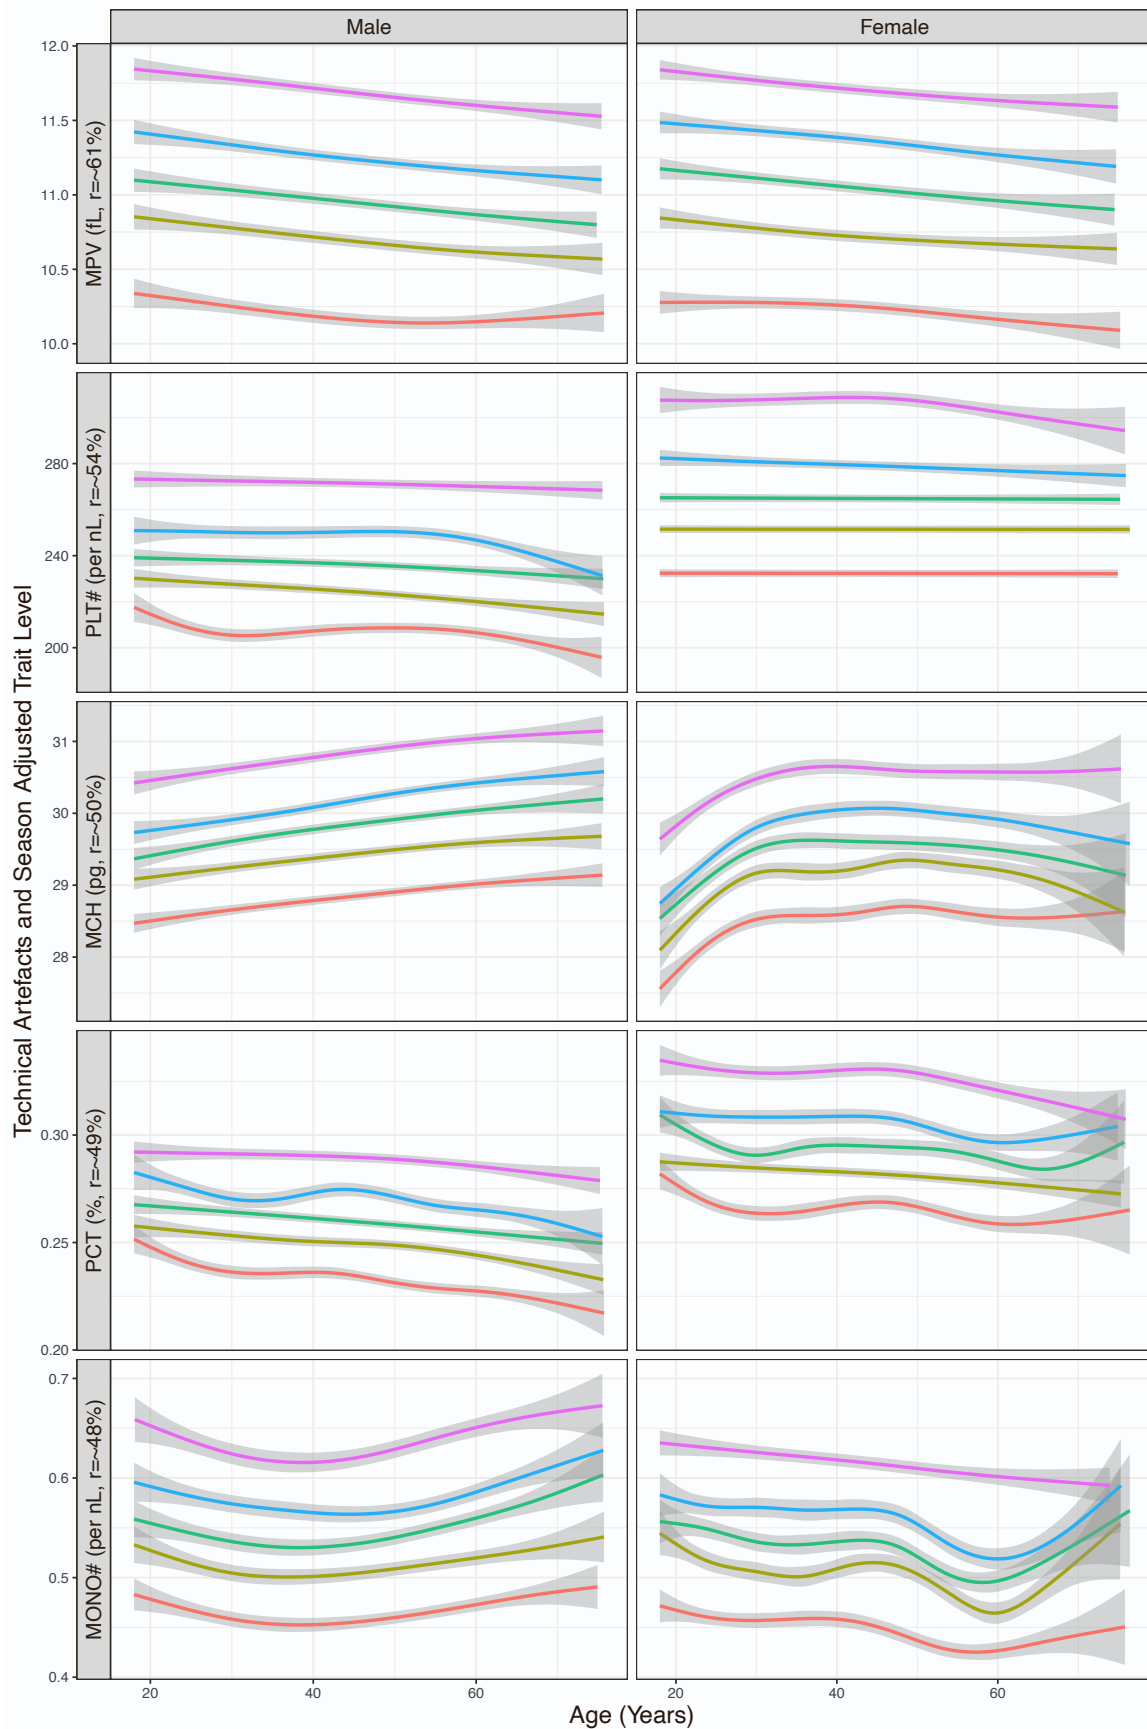

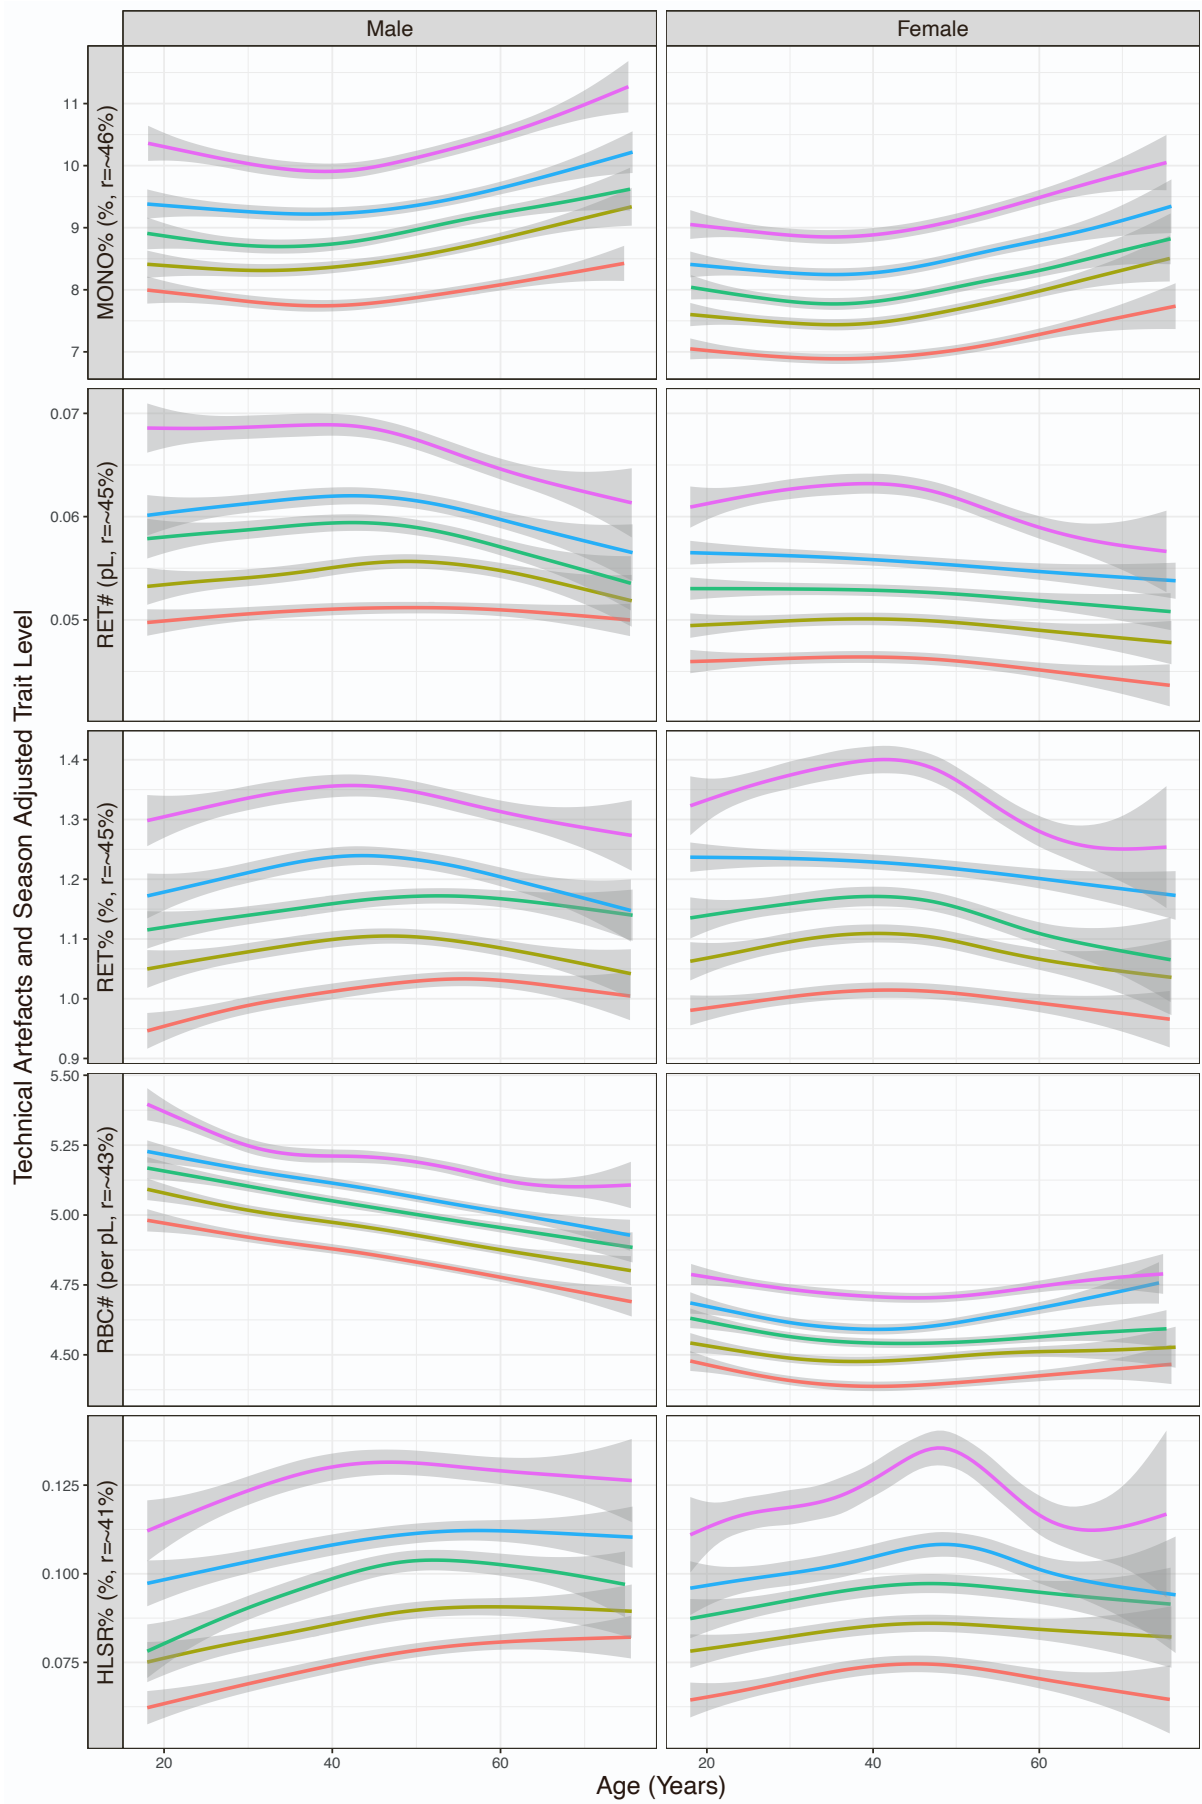

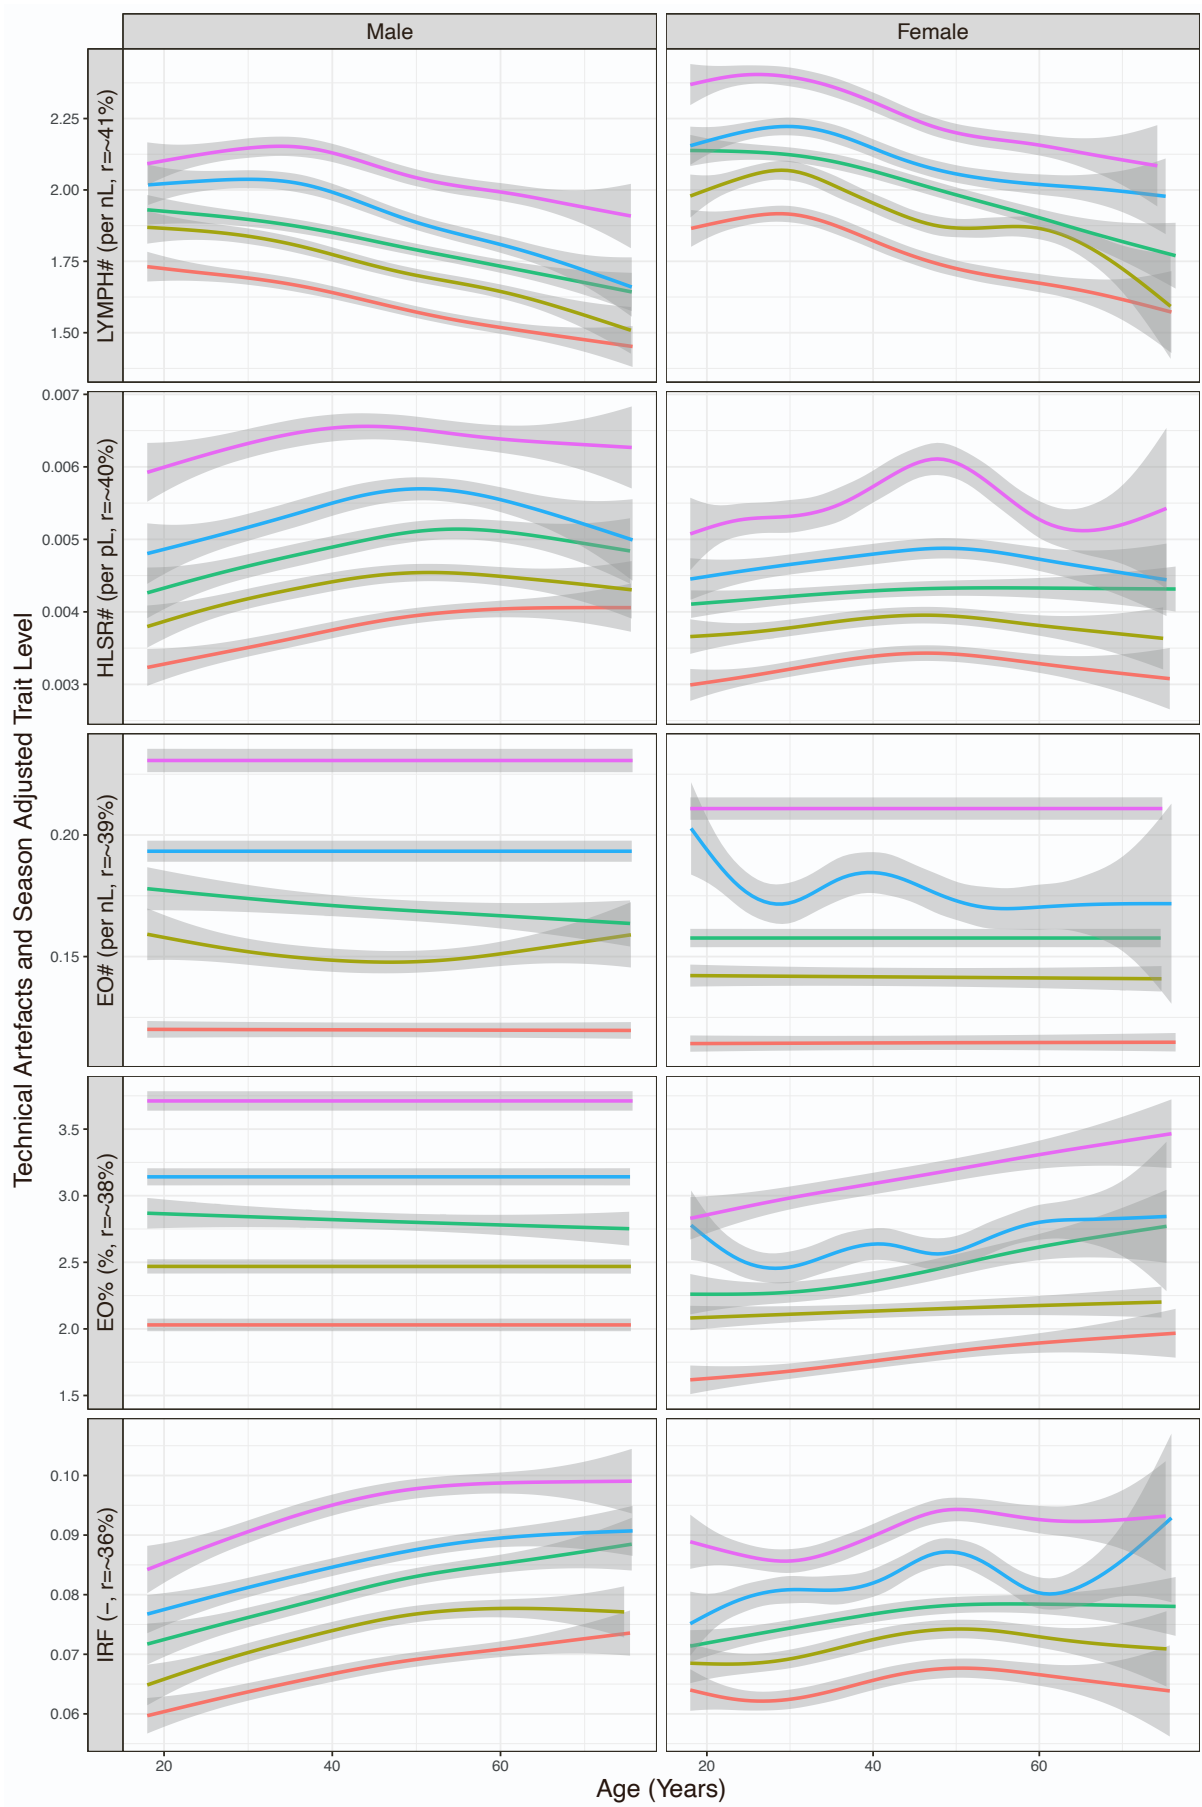

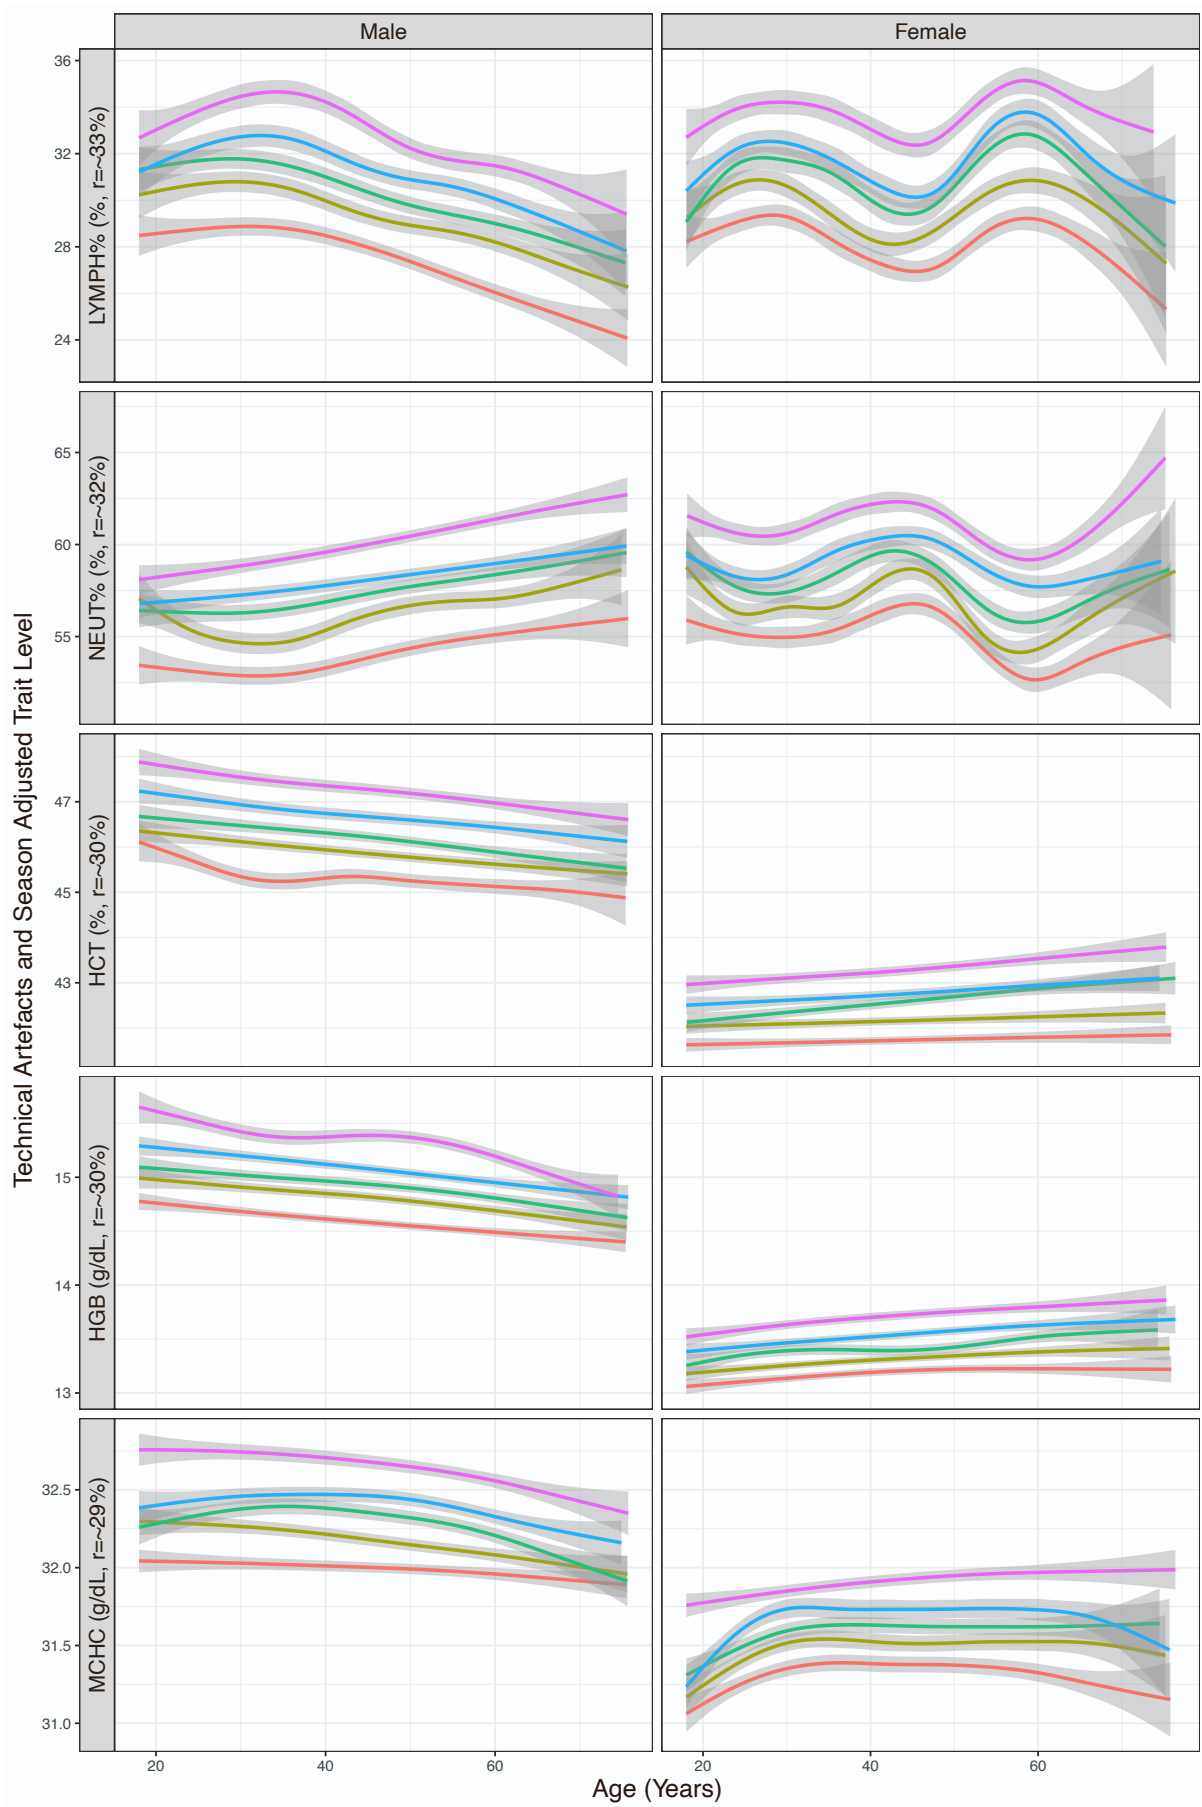

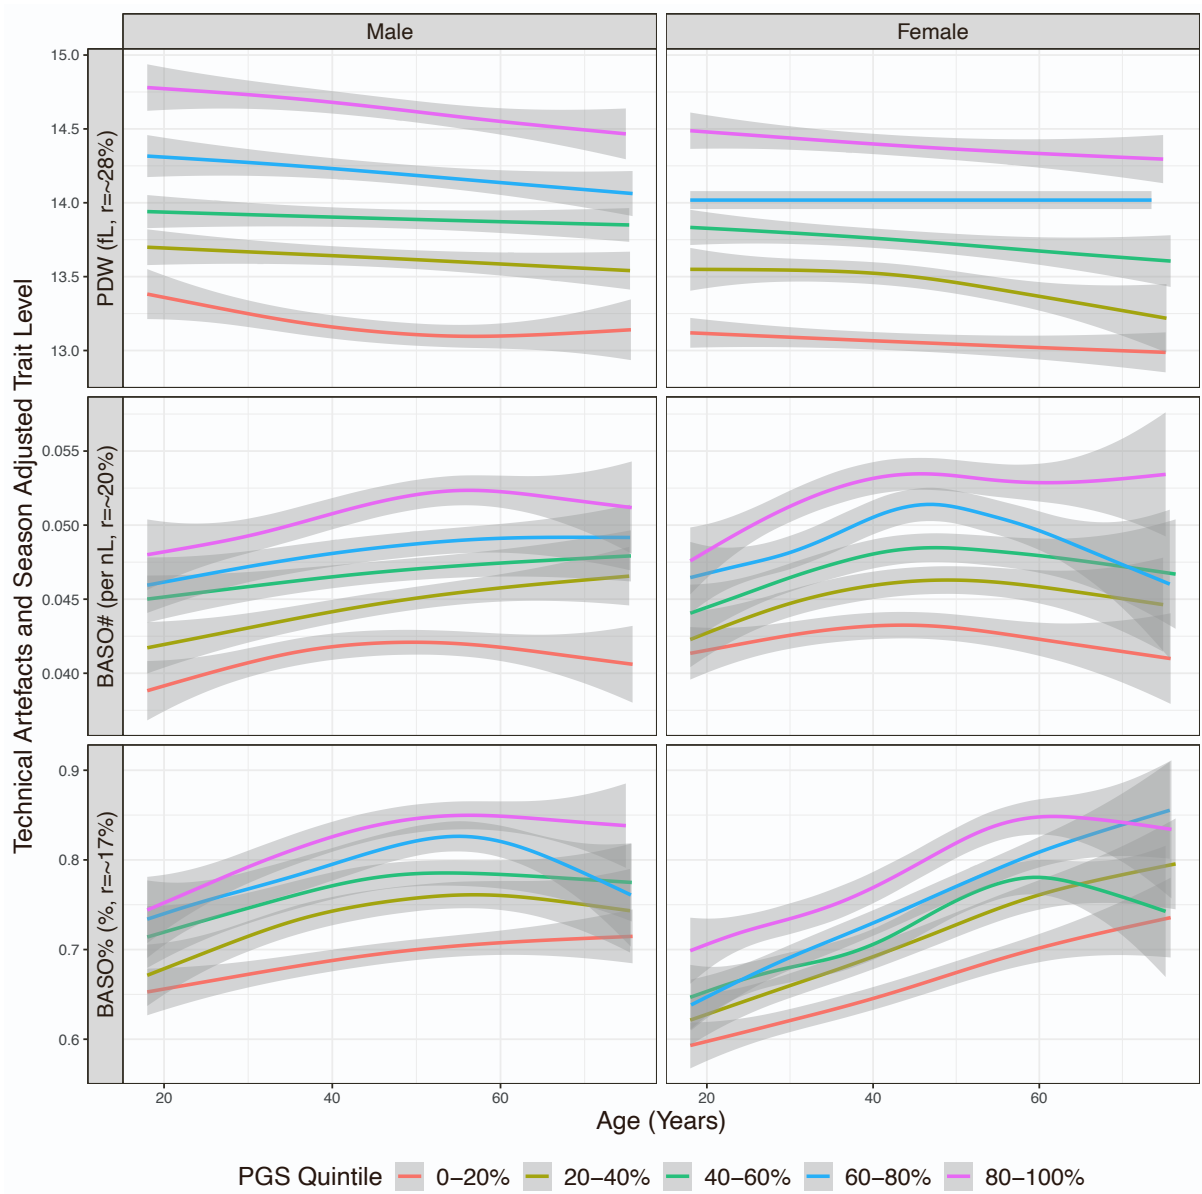

**Figure S4. An example of a three-layer MLP, related to STAR Methods.** The output  $y = f^3(f^1(SNP_1, SNP_2, SNP_3); f^2(SNP_1, SNP_2, SNP_3))$

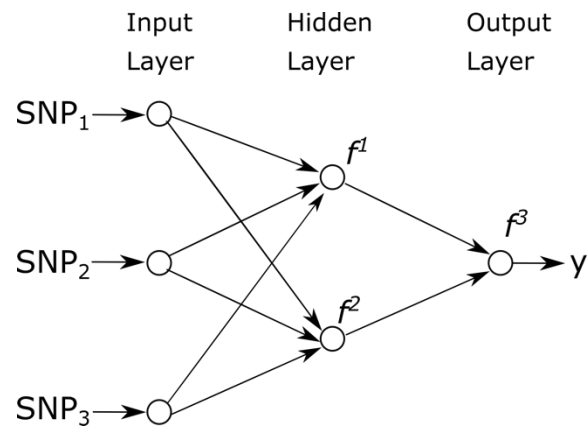



**Figure S5. (a) An example of a one-dimensional CNN. (b) An example of a convolution operation. (c) An example of a max pooling operation, related to STAR Methods.** The convolution kernel in (b) has a size of  $1 \times 2$  and operates with a stride of 1. The max pooling filter in (c) has a size  $1 \times 2$  and operates with a stride of 1. The CNN in (a) has an input of a one-dimensional vector with  $n$  units, and has a convolution layer and a pooling layer. The dimension  $m$  of a newly generated representation via a convolution operation relies on the size of the kernel being applied as well as other possible factors, e.g. padding approaches, and the number of new representations  $l$  is equivalent to the number of kernels used in the model. The dimension  $k$  of a new representation after pooling is decided by the filter size being used.

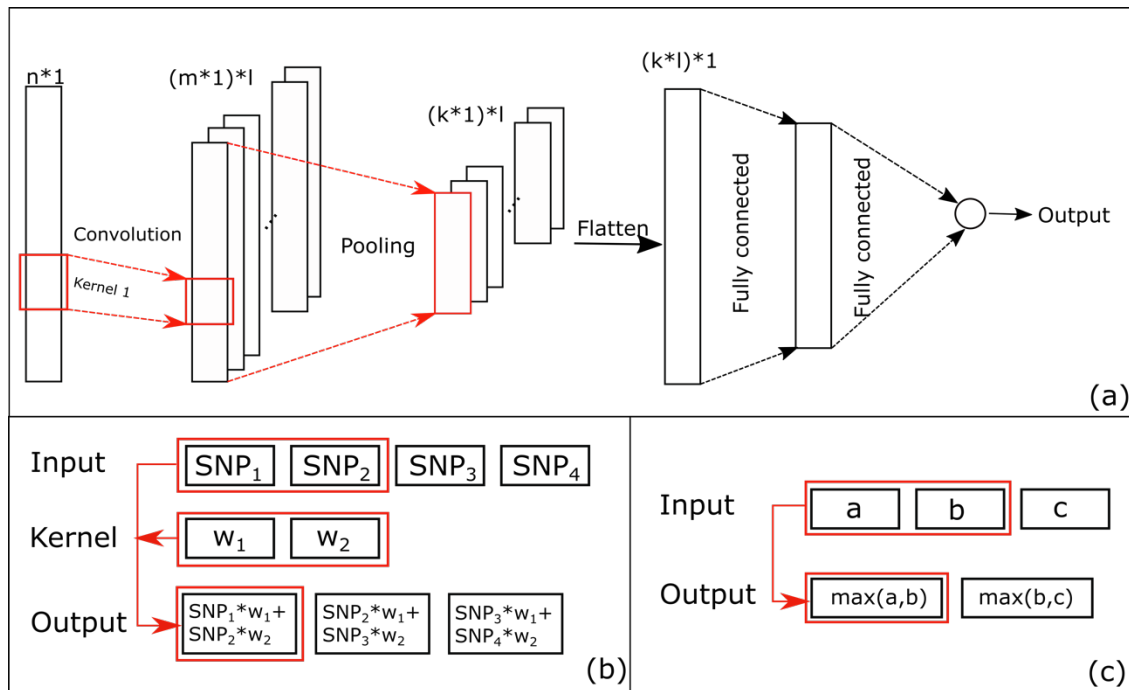

Supplement: mmc1.pdf [file mmc1.pdf]
